# Supplementary material for: Healthcare in England was affected by the COVID-19 pandemic across the pancreatic cancer pathway: A cohort study using OpenSAFELY-TPP
Source: eLife journal article supplement (doi:10.7554/elife.85332), 2023-07-28

**Supplement Figure 1. Study flowchart**

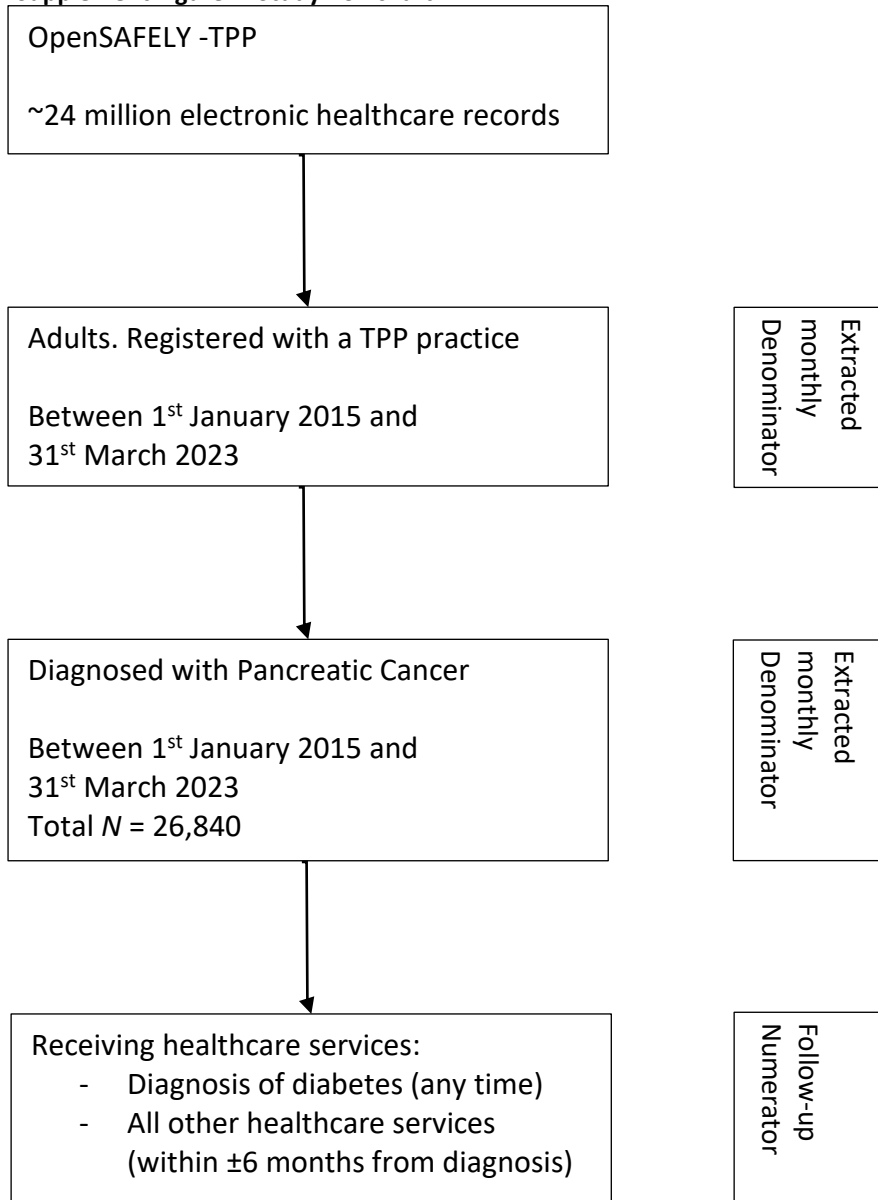

Supplement: supp1 [file elife-85332-supp1-v1.pdf]
